1 ***De novo* genome and transcriptome analyses provide insights**  
2 **into the biology of the trematode human parasite *Fasciolopsis***  
3 ***buski***

4 Devendra K. Biswal<sup>1</sup>†, Tanmoy Roychowdhury<sup>2</sup>†, Priyatama Pandey<sup>2</sup>, Veena  
5 Tandon<sup>1,3,§</sup>

6 <sup>1</sup>Bioinformatics Centre, North-Eastern Hill University, Shillong 793022,  
7 Meghalaya, India

8 <sup>2</sup>School of Computational and Integrative Sciences, Jawaharlal Nehru University,  
9 New Delhi 110067, India

10 <sup>3</sup>Department of Zoology, North-Eastern Hill University, Shillong 793022,  
11 Meghalaya, India

12 †Equal contributors

13 §Corresponding author

14

15 Email addresses:

16 DKB: devbioinfo@gmail.com

17 TR: tanmoy63@gmail.com

18 PP: priyatamapandey@gmail.com

19 VT: tandonveena@gmail.com

20

21

22 **Abstract**

23 Many trematode parasites cause infection in humans and are thought to be a  
24 major public health problem. Their ecological diversity in different regions  
25 provides challenging questions on evolution of these organisms. In this report,  
26 we perform transcriptome analysis of the giant intestinal fluke, *Fasciolopsis*  
27 *buski*, using next generation sequencing technology. Short read sequences  
28 derived from polyA containing RNA of this organism were assembled into 30677  
29 unigenes that led to the annotation of 12380 genes. Annotation of the assembled  
30 transcripts enabled insight into processes and pathways in the intestinal fluke,  
31 such as RNAi pathway and energy metabolism. The expressed kinome of the  
32 organism was characterized by identifying all protein kinases. We have also  
33 carried out whole genome sequencing and used the sequences to confirm  
34 absence of some of the genes, not observed in transcriptome data, such as  
35 genes involved in fatty acid biosynthetic pathway. Transcriptome data also  
36 helped us to identify some of the expressed transposable elements. Though  
37 many Long Interspersed elements (LINEs) were identified, only two Short  
38 Interspersed Elements (SINEs) were visible. Overall transcriptome and draft  
39 genome analysis of *F. buski* helped us to characterize some its important  
40 biological characteristics and provided enormous resources for development of a  
41 suitable diagnostic system and anti-parasitic therapeutic molecules.

42

43

44 **Introduction**

45 *Fasciolopsis buski* (giant intestinal fluke) is one of the largest digenean  
46 trematode flatworms infecting humans causing the disease fasciolopsiasis, with  
47 epidemiological records from Asia including the Indian subcontinent. Clinical  
48 manifestation of the disease is diarrhea, with presence of ulceration, intestinal  
49 wall abscess and hemorrhage, with the possibility of death if not treated in time  
50 [1]. Majority of the infected people (up to 60% in India and the mainland China)  
51 remain asymptomatic without manifestation of clinical invasive disease [1,2].

52 In India, these trematodes have been reported from different regions  
53 including the Northeast, associated with animal rearing (mainly pigs), or in  
54 underwater vegetables such as water chestnut. Although *F. buski* inhabits warm  
55 and moist regions and has been reported as single species in the genus,  
56 morphological variations among flukes from different geographical isolates have  
57 been observed suggesting genetic polymorphism or host-specific parasite  
58 adaptation [3,4].

59 Infective metacercarial cysts usually occur in 15-20 groups on the surface  
60 of aquatic vegetation [5,6] and once consumed, the juvenile adult stage of *F.*  
61 *buski* emerges and adheres to the small intestine of its host, attached until the  
62 host dies or is removed [1,2,7]. Unembryonated eggs are discharged into the  
63 intestine in the fecal material, with release of parasitic organisms (miracidia) two-  
64 week post infection. These hatch between 27–32°C, and invade snails  
65 (intermediate host) where developmental stages (sporocysts, rediae, and  
66 cercariae) are reported. The cercariae released and encysted as metacercariae

67 (on aquatic plants), infect the mammalian host and develop into adult flukes  
68 completing its life cycle [8].

69 The current strategy for control of fasciolopsiasis, similar to that for other  
70 trematodes, such as *Gastrodiscoides hominis* is by blocking transmission among  
71 different hosts, i.e., human, animal reservoir and intermediate host (molluscan)  
72 [5]. Many drugs have been used to treat fasciolopsiasis. The drug of choice is  
73 praziquantel since it has high efficacy even in cases of severe fasciolopsiasis [9,  
74 10, 11, 12, 13, 14]. More recently, the efficacy of triclabendazole, oxclozanide  
75 and rafoxanide has been evaluated in pigs with favorable response to treatment  
76 [15]. Despite control programs, public health is a concern in endemic areas, and  
77 there is a need for new control measures with reports of sporadic re-emergence  
78 of infection (in Uttar Pradesh, India) from non-endemic regions [16, 17, 18, 19].

79 Development of novel therapeutic agents targeting intestinal flukes is  
80 complex. The parasite biology occurs in multi-host life cycles and mechanisms  
81 for parasite host immune evasion strategies are not well understood. Genomics  
82 approaches are likely to be more successful in identifying new targets for  
83 intervention. Unfortunately, little genomic information is available for *F. buski* in  
84 the public domain other than a PCR-based molecular characterization using ITS  
85 1 & 2 regions of ribosomal DNA (rDNA) genes [20,21]. Developments in next  
86 generation sequencing (NGS) technologies and computational analysis tools  
87 enable rapid data generation to decipher organismal biology [22, 23, 24, 25, 26].  
88 NGS analysis to understand transcriptomes of related organisms, such as  
89 *Fasciola gigantica*, *Fasciola hepatica*, *Schistosoma mansoni*, *Schistosoma*

90 *japonicum*, *Clonorchis sinensis*, *Opisthorchis viverrini*, *Fascioloides magna* and  
91 *Echinostoma caproni* reveal genes involved in adult parasite-host responses,  
92 such as antioxidants, heat shock proteins and cysteine proteases [27, 28, 29, 30,  
93 31, 32]. Lack of molecular analysis of *F. buski* has hampered understanding of  
94 evolutionary placement of this organism among other *Fasciola*, as well as our  
95 understanding of mechanisms that regulate host-pathogen relationships.  
96 Previously we have reported the mitochondrial DNA (mt DNA) of the intestinal  
97 fluke for the first time that would help investigate Fasciolidae taxonomy and  
98 systematics with the aid of mtDNA NGS data [33]. Here, we report results of our  
99 effort to characterize the transcriptome of the adult stage of *F. buski*. NGS  
100 technology was used to get RNA-seq and bioinformatics analysis was carried out  
101 on the sequence output. In a few cases we have used the *F. buski* draft genome  
102 sequence to confirm our observations.

103

## 104 **Materials and methods**

### 105 **Source of parasite material**

106 *F. buski* adult specimens were obtained from the intestine of freshly  
107 slaughtered pig (*Sus scrofa domestica*) by screening for naturally infected pigs  
108 among the animals routinely slaughtered for meat purpose at the local abattoirs.  
109 The worms reported in this study represent geographical isolates from the  
110 Shillong area (25.57°N, 91.88°E) in the state of Meghalaya, Northeast India.  
111 Eggs were obtained by squeezing mature adult flukes between two glass slides.  
112 Adult flukes collected from different pig hosts were processed singly for the

113 purpose of DNA extraction and eggs were recovered from each of these  
114 specimens separately.

115 All sample were obtained from animals used for local meat consumption  
116 and no live animals were handled or sacrificed for this study. Hence there was no  
117 need to follow relevant guidelines as laid down for handling live vertebrates.

## 118 **RNA and DNA extraction, Illumina sequencing**

119 Briefly, the adult flukes were digested overnight in extraction buffer  
120 [containing 1% sodium dodecyl sulfate (SDS), 25 mg Proteinase K] at 37°C, prior  
121 to DNA recovery. Genomic DNA was then extracted from lysed individual worms  
122 by ethanol precipitation technique or by FTA cards using Whatman's FTA  
123 Purification Reagent [34]. Quality and quantity of the DNA was assessed by 0.8%  
124 agarose gel electrophoresis (Sigma-Aldrich, USA), spectrophotometer (Nanodrop  
125 1000, Thermofischer USA) and flurometer (Qubit, Thermofischer, USA). Whole  
126 genome shot-gun libraries for Illumina sequencing were generated and the  
127 genomic DNA was sheared (Covaris, USA), end-repaired, adenylated  
128 phosphorylate ligated to Illumina adapters (TruSeq DNA, Illumina, USA), to  
129 generate short (300-350 bp) fragment and long (500 – 550) bp insert libraries.  
130 Both libraries were amplified using 10 cycles of PCR KapaHiFiHotstart PCR  
131 ready mix (Kapa Biosystems Inc., USA) and adapter removal by Solid Phase  
132 Reversible Immobilization (SPRI) beads (Ampure XP beads, Beckmann-coulter,  
133 USA). Prior to sequencing, fragment analysis was performed (High Sensitivity  
134 Bioanalyzer Chip, Agilent, USA), quantified by qPCR. 36cycle sequencing was  
135 performed on Illumina Genome analyzer II (SBS kit v5, Illumina, USA) and

136 Illumina HiSeq1000 (Illumina, USA) to generate 16 million 100 paired-end reads  
137 from the shot-gun library.

138 Total RNA was collected from a single frozen adult individual fluke (~100mg  
139 tissue) using TRI reagent® (Sigma, USA). The integrity of total RNA was verified  
140 using Bioanalyzer Agilent 2100 with RNA integrity number 9. Transcriptome  
141 libraries for sequencing was constructed from poly A RNA isolated from 1ug total  
142 RNA (OligoTex mRNA minikit, Qiagen GmbH, Germany), that was fragmented,  
143 reverse transcribed (Superscript II Reverse transcriptase, Invitrogen, USA) with  
144 random hexamers as described in (TruSeq RNA Sample Preparation Kit,  
145 Illumina, USA). The cDNA was end-repaired, adenylated and cleaned up by  
146 SPRI beads (Ampure XP, Beckman Coulter, USA) prior to ligation with Illumina  
147 single index sequencing adapters (TruSeq RNA, Illumina, USA). The library was  
148 amplified using 11 cycles of PCR and quantified using Nanodrop (Agilent). The  
149 prepared library was validated for quality by running an aliquot on High  
150 Sensitivity Bioanalyzer Chip (Agilent) that displayed a confident bioanalyzer  
151 profile for transcriptome sequencing.

## 152 **De novo assembly, annotation and characterization of** 153 **transcriptome**

154 Illumina-generated paired end reads were filtered for low quality scores (PHRED  
155 score < 30). From 32010511 (32.01 millions) high quality raw reads (>70% of  
156 bases in a read with >20 phred score), 47957 contiguous sequences were  
157 assembled. Reads containing ambiguous characters were also removed from the  
158 dataset. The high-quality reads were then assembled using Trinity software [35]

159 designed for transcriptome assembly. Default parameters were used for this  
160 purpose. While Trinity can identify different isoforms, our initial target was to  
161 identify the unigene transcripts. Thus, transcripts were subjected to clustering  
162 using CD-HIT-EST [36] at 90% similarity. To assess the quality of assembly, raw  
163 reads were mapped back to unigenes using Bowtie [37]. Reads aligning in  
164 multiple locations were randomly allocated to one of the unigenes. Different  
165 properties, such as average read depth, coverage, and percent uniquely mapped  
166 reads were calculated. The numbers of raw reads were normalized for length and  
167 RPKM (reads per kilobase of exon per million of mapped reads) values were  
168 calculated in order to quantify relative abundance of each unigene for estimating  
169 the levels of expression.

170 All unigenes were annotated using both sequence and domain-based  
171 comparisons that involved sequence similarity analysis with non-redundant (NR)  
172 protein database of NCBI (<http://www.ncbi.nlm.nih.gov/>), Uniprot (Swissprot +  
173 trEMBL) [38] and Nembase4 EST database [39] using BLASTx and tBLASTn  
174 [40]. Significant threshold of E-value  $\leq 10^{-5}$  was used as a cutoff. Since we were  
175 not able to annotate large numbers of unigenes using sequence similarity,  
176 conserved domains were further identified in InterPro database [41] (HMMpfam,  
177 HMMsmart, HMMpanther, FPrintScan, BlastProDom) and Clusters of  
178 Orthologous Groups (COG) database [42] using InterProScan and BLASTx  
179 respectively. Functional categorization was assigned by finding Gene Ontology  
180 terms of best BLASTx hits against NR database using Blast2GO software [43]  
181 (<http://www.blast2go.com/b2ghome>). GO assignments were represented in a plot



182 generated by WEGO [44]. Comparative analysis of the transcriptome was  
183 performed against other trematodes. Transcriptome datasets of trematode  
184 parasites, viz. *Fasciola hepatica*, *Fasciola gigantica*, *Clonorchis sinensis*,  
185 *Opisthorchis viverrini*, *Schistosoma mansoni* and *Schistosoma japonicum* were  
186 downloaded from NCBI Short Read Archive (SRA) database  
187 (<http://www.ncbi.nlm.nih.gov/sra/>). Unigenes were mapped to different KEGG  
188 pathways using KAAS [45]. All unigenes were used against the KEGG database  
189 by a Bi-directional best-hit method suitable for whole genome or transcriptome  
190 data. KEGG orthologs were displayed in iPath2 [46]. ORFs were predicted using  
191 ORFpredictor [47] ([http://proteomics.yzu.edu/tools /OrfPredictor.html](http://proteomics.yzu.edu/tools/OrfPredictor.html)). Signal  
192 peptides were identified using SignalP [48]  
193 (<http://www.cbs.dtu.dk/services/SignalP/>) and transmembrane domains were  
194 identified using TMHMM [49]. Kinases and peptidases were identified by  
195 comparison against EMBL kinase database (<http://www.sarfari.org/kinasesarfari>)  
196 and MEROPS database [50] consecutively. Orthologs of RNAi pathway proteins  
197 of *Caenorhabditis elegans* in *F. buski* were identified by a reciprocal BLAST hit  
198 strategy. Raw reads generated from *F. buski* transcriptome were submitted in  
199 NCBI SRA (<https://trace.ncbi.nlm.nih.gov/Traces/sra/?run=SRR941773>) under  
200 the accession number SRX326786.

## 201 ***De novo* assembly of draft genome and identification of** 202 **transposable elements:**

203 Short read sequences from the *F. buski* genome were assembled using a  
204 number of assembly tools, such as SOAP denovo [51], Velvet [52] and Abyss

205 [53]. These algorithms use de Bruijn graph for genomic sequence assembly.  
206 Default parameters were used to assemble 42425988 paired end reads of  
207 different insert size libraries. Each assembly program was used with a range of  
208 K-mers. Statistics of best assemblies in respect of N50 values by three programs  
209 are given in S1 Table. These assembly results suggest Trinity assembler  
210 generated higher N50 comparatively for this dataset. Further analysis of *F. buski*  
211 genome was performed on this reference draft genome assembly. RepeatMasker  
212 [54] was used to identify repetitive and transposable elements with default  
213 parameters. It makes use of RepBase libraries [version 20120418]  
214 ([www.girinst.org](http://www.girinst.org)) that are used as a reference for the identification of  
215 transposable and repetitive elements in a query sequence. Transcripts obtained  
216 from the transcriptome were matched to the draft assembly. The raw reads  
217 generated from *F. buski* genome were submitted in NCBI SRA  
218 ([www.ncbi.nlm.nih.gov/sra/](http://www.ncbi.nlm.nih.gov/sra/)) under the accession numbers SRX3087506,  
219 SRX327895 (genome data) and SRX326786 (transcriptome data).

## 220 **Results**

### 221 ***De novo* assembly and annotation of transcriptome**

222 The whole genome and transcriptome data are sequenced from the adult  
223 specimens of *F. buski* that were collected from pigs with a naturally acquired  
224 infection at an abattoir in Shillong, Meghalaya. Detailed statistics of initial output  
225 generated by Trinity is shown in S1 Table. Initial output was then subjected to  
226 CD-HIT-EST to identify clusters and the results showed 43111 clusters with 3298  
227 singletons representing 46409 unigene transcripts. After assessment of the

228 assembly (S2 Table), 30677 high-quality unigenes were used for subsequent  
229 analysis. We were able to predict ORFs for 30628 unigenes with the mean length  
230 of ORF being 185 amino acids. The methionine start codon (ATG) was present in  
231 23759 (77.4%) ORFs.

232 *F. buski* unigenes matched with 12279 sequences of NCBI non-redundant  
233 (NR) database with an E-value less than 1E-05 on BLAST analysis (S3 Table).  
234 Best hit for each unigene was ranked according to E-values. We report many  
235 significant BLAST hits to *C. sinensis* (55%), *S. mansoni* (21%) and *S. japonicum*  
236 (14%), with less similarity to *F. hepatica* or *F. gigantica*. This may be due to the  
237 availability and skew of sequence databases for the two *Fasciola* species.  
238 Although, an identity cutoff of E-value  $\leq 1E^{-05}$  was applied for identification of  
239 remote homologs, 68% of the unigenes were matched with similarity of E-values  
240 less than  $1E^{-30}$ . Annotation of the unigenes depended on the length of the  
241 unigenes, and shorter unigenes (13% of smaller than 500 bp) were not matched,  
242 while the longer unigenes (91% of unigenes above 2000 bp) were annotated.  
243 The high percentage of annotation suggested an accurate assembly, and  
244 presence of functionally informative datasets for *F. buski*.

245 Unigenes were also annotated by sequence comparison against  
246 Uniprot/Swissprot and Uniprot/trEMBL database. We found 8089 unigenes that  
247 showed significant similarity with at least one Swissprot entry and 12231 with at  
248 least one trEMBL entry, totaling 12242 unique unigenes. Analysis using  
249 NEMBASE4 database helped us to find putative function of 6776 unigenes.

250 Overall 6752 unigenes displayed significant sequence matches against all three  
251 databases used for sequence-based annotation.

252 Identification of conserved domains and motifs sometimes helps in  
253 functional classification of genes. Interpro scan helped us to identify 3309 unique  
254 domains/families in 6588 unigenes. Out of these, 1775 (53.6%) domains/families  
255 were associated with only one unigene. Some of the best hits are given in S4  
256 Table. Among these, protein kinases and ankyrin repeat domains were found to  
257 be more prevalent. Protein kinases play a significant role in signaling; Ankyrin  
258 repeat containing proteins are involved in a number of functions, such as integrity  
259 of plasma membrane, and WD40 repeat is associated with signal transduction  
260 and transcription regulation.

261 Unigenes were also classified using Clusters of Orthologous (COG)  
262 database at <http://www.ncbi.nlm.nih.gov/COG/>. Each entry in COG is supported  
263 by the presence of the sequence in at least three distinct lineages, thereby  
264 representing an ancient conserved domain. A total of 4665 (15.2%) unigenes  
265 were assigned with different functional terms (S5 Table). Though most of the  
266 unigenes displayed more than one hit, a majority of them were from the same  
267 COG functional class. Best hits were further processed for functional  
268 classification. The results are shown in Fig 1. Large numbers of unigenes  
269 mapped to “Post translational modification, protein turn over, chaperons” (354;  
270 7.5%), “Translation, ribosomal structure and biogenesis” (289; 6.1%),  
271 “Replication, recombination and repair” (216; 4.6%) and “Signal transduction  
272 mechanisms” (195; 4.1%) in addition to “general function prediction” (938;

273 20.1%). In contrast, there were very few genes that mapped to functional classes  
274 “cell motility” (7) and “nuclear structure” (2).

275 **Fig 1. COG classification of *F. buski* transcriptome.** The X-axis and Y-axis  
276 represent different COG categories and number of unigenes associated with  
277 each COG category respectively.

278

279 Since secretory proteins, such as those that are classified as excretory  
280 and secretory proteins (ES), are involved in host-parasite interactions, we  
281 identified proteins that belong to this category. Our analysis showed that 1501  
282 unigenes contained signal peptides and there were 1406 ES proteins. Their  
283 identification was done by the presence of a signal peptide domain and the  
284 absence of any trans-membrane domain.

285 Sequences that matched significantly with NCBI nr database were further  
286 processed using BLAST2GO for GO assignment. This analysis was done to  
287 further classify expressed genes into different functional classes. A total 36433  
288 GO terms were assigned to 6658 unigenes. The results of this analysis are  
289 depicted in Fig 2. Majority of the GO terms were from “biological processes”  
290 (2627; 56.2%), while others represented “molecular function” (1445; 30.9%) and  
291 “cellular component” (602; 12.8%). The major sub-categories were found to be  
292 mostly those associated with cell structure and function and metabolic  
293 processes, such as “cell” (GO: 005623), “cell part” (GO: 0044464), “macro-  
294 molecular complex” (GO: 0032991) and “organelle” (GO: 0043226), “catalytic  
295 function” (GO: 0003824) and “metabolic process” (GO: 0008152). Considering all

296 levels of GO assignment, a significant number of sequences were found to be  
297 associated with “Regulation of transcription, DNA-dependent” (GO: 0006355;  
298 344), “integral to membrane” (GO: 0016021; 925) and “ATP binding” (GO:  
299 0005524; 1086).

300 **Fig 2. Gene ontology classification of *F. buski* transcriptome.** GO terms  
301 assigned to Unigenes were classified into three major functional classes; Cellular  
302 component, Biological process and Molecular function.

303

304 A Venn diagram summarizing annotation analysis using five databases is  
305 given in Fig 3. It was possible for us to annotate 12380 unigenes using both  
306 sequence as well as domain-based comparisons. The mean length of annotated  
307 unigenes was found to be 1727, which is higher than the mean length (1080) of  
308 all the unigenes thus, showing the importance of assembly quality for annotation  
309 (S1 Fig). It is expected that unannotated unigenes may participate in unique  
310 biological functions specific to this organism.

311 **Fig 3. Venn diagram showing a number of annotated unigenes using**  
312 **sequence based and domain based comparisons.** A) Unigenes were  
313 compared with NR, Uniprot and Nembase4 for sequence-based annotation.  
314 Circle intersections represent number of unigenes found in more than one  
315 databases. B) Unigenes were compared against COG and INTERPRO  
316 databases for domain-based annotation. C) Two circles A and B represent  
317 number of sequences annotated using sequence based and domain based

318 comparisons respectively. The numbers outside circles represent number of  
319 sequences remained unannotated after employing all these comparisons.

320

## 321 **Comparison with other trematodes**

322 A comparative sequence analysis was performed with RNA-seq datasets of  
323 different trematode families in order to understand functional divergence. The  
324 results are summarized in Table 1 and in Venn diagram (Fig 4). The analysis  
325 revealed that 54% of the unigenes displayed sequence similarity with one of the  
326 trematodes and 19% with all trematodes analyzed at an E-value threshold of  $1E^{-05}$ .  
327 When sequence similarity values at different E-value cut-offs were compared  
328 transcript sequences from *F. gigantica* appeared to be evolutionarily the closest  
329 as it displayed highest number of matches at a given E-value among trematodes  
330 studied. Further, to reconstruct evolutionary relationships of *F. buski* with other  
331 trematodes, we computed a phylogenetic tree (Fig 5) concatenating all the  
332 annotated 12 protein-coding genes (PCGs) from the *F. buski* mitochondrial DNA  
333 (mtDNA). The mtDNA for the intestinal fluke was recovered from the *F. buski*  
334 genome data and is available in NCBI SRA bearing accession no. SRX316736.  
335 Previous studies confirm that alignments with > 10,000 nucleotides from  
336 organelle genomes have ample phylogenetic signals for evolutionary  
337 reconstruction of tapeworm phylogeny [55]. The phylogenetic tree is well  
338 supported by very high posterior probabilities as the taxa grouped well into  
339 distinct clades representing the different worm Families such as Opisthorchiidae,  
340 Paragonimidae, Paramphistomidae and Fasciolidae (Trematoda); Ascarididae

341 (Nematoda) and Taeniidae (Cestoda). *F. buski* claded well with *F. hepatica* and  
342 *F. gigantica* with strong bootstrap support.

343 **Fig 4. Venn diagram showing number of homologs found in *F. buski***  
344 **transcriptome against transcriptome/EST datasets of major trematode**  
345 **families of Opisthorchiidae (*Opisthorchis viverrini* and *Clonorchis***  
346 ***sinensis*), Fasciolidae (*Fasciola hepatica* and *Fasciola gigantica*) and**  
347 **Schistosomatidae (*Schistosoma mansoni* and *Schistosoma japonicum*).**

348

349 **Fig 5. Bayesian phylogenetic relationship among the representative**  
350 **helminth species based on 12 PCGs from their mitochondrial DNA.**

351 Phylogenetic analyses of concatenated nucleotide sequence datasets for all 12  
352 PCGs were performed using four MCMC chains in bayesian analysis run for  
353 1,000,000 generations, sampled every 1,000 generations. Bayesian posterior  
354 probability (BPP) values were determined after discarding first 25% of trees as  
355 burn-in. Posterior support values appear at nodes. Species representing  
356 Nematoda (Ascaridida) were taken as outgroup.

357

358 **Table 1. Comparative sequence analysis of *F. buski* transcriptome with**  
359 **different trematodes.**

| <b>Organism</b>               | <b>1E-05</b>  | <b>1E-15</b>  | <b>1E-30</b> |
|-------------------------------|---------------|---------------|--------------|
| <i>Fasciola gigantica</i>     | 15538 (50.6%) | 12376 (40.3%) | 9880 (32.2%) |
| <i>Opisthorchis viverrini</i> | 11635 (37.9%) | 9250 (30.1%)  | 7289 (23.7%) |
| <i>Clonorchis sinensis</i>    | 11188 (36.4%) | 8858 (28.8%)  | 6984 (22.7%) |
| <i>Fasciola hepatica</i>      | 11004 (35.8%) | 7207 (23.4%)  | 4695 (15.3%) |
| <i>Schistosoma mansoni</i>    | 9742 (31.7%)  | 7146 (23.2%)  | 4984 (16.2%) |
| <i>Schistosoma</i>            | 8634 (28.1%)  | 6433 (20.9%)  | 4685 (15.2%) |



|                  |  |  |  |
|------------------|--|--|--|
| <i>japonicum</i> |  |  |  |
|------------------|--|--|--|

360

361

362           Out of the homologs of *F. buski* unigenes found in trematodes but not in  
363 model eukaryotes, 3552 could be annotated. These genes are likely to be  
364 trematode specific and can be a useful resource in development of new  
365 diagnostic and therapeutic tools. Our results suggest relatively high level of  
366 sequence divergence among coding regions (ortholog divergence) of different  
367 trematodes, probably a result of adaptation to different ecological conditions.

368

369

370

## 371 **Pathway analysis**

372           We used KEGG automatic annotation server (KAAS) for identification of  
373 pathways associated with unigenes. About 3026 sequences were annotated with  
374 2527 KO terms. In total, 287 different pathways, classified into six major groups,  
375 were identified (Table 2). Some of the genes could not be tracked in the  
376 transcriptome. This is presumably due to lack of expression in the adult flukes,  
377 but could also represent transcripts that are not polyadenylated and thus were  
378 not included in our transcript pools. In either case, a high quality genome  
379 sequence data with better depth coverage would be required to confirm the  
380 existence or absence of the genes. Major pathways deciphered are those  
381 involved in metabolism (638 unigenes, 520 KO terms), such as carbohydrates,

382 amino acids, energy metabolism and genetic information processing (790  
383 unigenes, 690 KO terms) transcription, translation, replication and repair, and  
384 those involved in human diseases (530 unigenes, 440 KO terms) cancer and  
385 neurodegenerative disorders. Overall, most highly represented KEGG terms by  
386 virtue of number of unique KO identifiers are Spliceosome (33), RNA transport  
387 (92) and protein processing in endoplasmic reticulum (83). Major components of  
388 metabolic pathways found in *F. buski* transcriptome are shown in S2 Fig. We  
389 could not detect most of the components of fatty acid biosynthesis pathway  
390 except acetyl-CoA/propionyl-CoA carboxylase [EC: 6.4.1.2; EC: 6.4.1.3] and 3-  
391 oxoacyl-[acyl-carrier-protein] synthase II [EC: 2.3.1.179]. We could not also  
392 detect these genes in the current draft genome of *F. buski*. Probably this can be  
393 better resolved with an improved genome assembly with higher depth coverage.  
394 While EC: 2.3.1.179 was identified in *F. hepatica*, *C. sinensis*, *O. viverrini*, *S.*  
395 *mansonii* transcriptomes [27, 28]; it was reported to be missing in *F. gigantica*  
396 [29]. It is not surprising as these parasites acquire fatty acids from the host [56].  
397 Pathways encoding enzymes of different amino-acid-biosynthesis pathways were  
398 represented only by one enzyme for valine, leucine and isoleucine biosynthesis  
399 [map00290], and under-represented for pathways, such as lysine biosynthesis  
400 [map00300] where no match was detected. In contrast, genes encoding enzymes  
401 in fatty acid metabolism [map00071] and amino acid metabolism [map00280;  
402 map00310; map00330] are well represented in the *F. buski* transcriptome. The  
403 skewed representation of enzymes in the pathway analysis provided clues on the

404 gene regulation and parasite biology pointing towards catabolic process, with a  
 405 likely dependence in this stage of its life cycle to their host for nutrition.

406 **Table 2: KEGG pathways identified from *F. buski* transcriptome using**  
 407 **KAAS.**

| <b>Metabolic Pathways</b>                      | <b>Unique KO terms</b> | <b>Top KEGG pathway terms</b>                        |
|------------------------------------------------|------------------------|------------------------------------------------------|
| Carbohydrate metabolism                        | 196                    | Glycolysis/Gluconeogenesis[k<br>o00010]              |
| Energy metabolism                              | 111                    | Oxidative phosphorylation<br>[ko00190]               |
| Lipid metabolism                               | 105                    | Glycerophospholipid<br>metabolism [ko00564]          |
| Nucleotide metabolism                          | 111                    | Purine metabolism [ko00230]                          |
| Amino acid metabolism                          | 131                    | Valine, leucine, isoleucine<br>degradation [ko00280] |
| Metabolism of other amino acids                | 37                     | Glutathione metabolism<br>[ko00480]                  |
| Glycan biosynthesis and<br>metabolism          | 91                     | N-Glycan biosynthesis<br>[ko00510]                   |
| Metabolism of cofactor and<br>vitamins         | 69                     | Porphyrin and chlorophyll<br>metabolism [ko00860]    |
| Metabolism of terpenoids and<br>polyketides    | 18                     | Terpenoid backbone<br>biosynthesis [ko00900]         |
| Biosynthesis of other secondary<br>metabolites | 14                     | Isoquinoline alkaloid<br>biosynthesis [ko00950]      |
| Xenobiotics biodegradation and<br>metabolism   | 35                     | Drug metabolism – other<br>enzymes [ko00983]         |
| <b>Genetic information<br/>processing</b>      |                        |                                                      |

|                                             |     |                                                       |
|---------------------------------------------|-----|-------------------------------------------------------|
| Transcription                               | 142 | Spliceosome [ko03040]                                 |
| Translation                                 | 293 | RNA transport [ko3013]                                |
| Folding, sorting and degradation            | 256 | Protein processing in endoplasmic reticulum [ko04141] |
| Replication and repair                      | 130 | Nucleotide excision repair [ko03420]                  |
| <b>Environmental information processing</b> |     |                                                       |
| Membrane transport                          | 12  | ABC transporters [ko02010]                            |
| Signal transduction                         | 310 | PI3K-Akt signaling pathway                            |
| Signaling molecules and interaction         | 21  | Neuroactive ligand-receptor interaction               |
| <b>Cellular processes</b>                   |     |                                                       |
| Transport and catabolism                    | 154 | Endocytosis [ko04144]                                 |
| Cell motility                               | 39  | Regulation of actin cytoskeleton [ko04810]            |
| Cell growth and death                       | 184 | Cell cycle [ko04681]                                  |
| Cell communication                          | 103 | Focal adhesion [ko04510]                              |
| <b>Organismal systems</b>                   |     |                                                       |
| Immune system                               | 167 | Chemokine signaling pathway [ko04062]                 |
| Endocrine system                            | 128 | Insulin signaling pathway [ko04910]                   |
| Circulatory system                          | 34  | Vascular smooth muscle contraction [ko04270]          |
| Digestive system                            | 86  | Pancreatic secretion [ko04972]                        |
| Excretory system                            | 54  | Vasopressin-regulated water reabsorption [ko04962]    |
| Nervous system                              | 209 | Neurotrophin signaling                                |

|                                  |     |                                         |
|----------------------------------|-----|-----------------------------------------|
|                                  |     | pathway [ko04722]                       |
| Sensory system                   | 19  | Phototransduction - fly [ko04745]       |
| Development                      | 46  | Axon guidance [ko04360]                 |
| Environmental adaptation         | 37  | Circadian entrainment [ko04713]         |
| <b>Human diseases</b>            |     |                                         |
| Cancers                          | 334 | Pathways in cancer [ko05200]            |
| Immune diseases                  | 25  | Rheumatoid arthritis [ko05323]          |
| Neurodegenerative diseases       | 226 | Huntington's disease [ko05016]          |
| Substance dependence             | 58  | Alcoholism [ko05034]                    |
| Cardiovascular diseases          | 24  | Viral myocarditis [ko05416]             |
| Endocrine and metabolic diseases | 10  | Type –II diabetes mellitus [ko04930]    |
| Infectious diseases              | 419 | Epstein –Barr virus infection [ko05169] |

408

409

## 410 **Highly expressed genes**

411 Expression status of transcripts can provide clues on their likely biological  
412 relevance [57]. To determine the relative expression levels RPKM values of each  
413 unigene was evaluated (S6 Table). RNA-seq can provide sensitive estimates of  
414 absolute gene expression variation [57]. We noted expression variation of  
415 unigenes upto 4th order of magnitude. However, only a few unigenes (5)  
416 displayed RPKM value >10,000 and 113 genes exceeding 1000. Among top 100  
417 highly expressed genes, functions linked to translation (ribosomal genes-40S,

418 60S ribosomal proteins, Elongation Factor EF1 $\alpha$ , Translation Initiation Factor  
419 TIF1), protein stress and folding (heat shock proteins 20 and 90 and 10 kDa  
420 chaperonins) constituted the majority. As expected, unigenes encoding  
421 cytoskeletal proteins were expressed at relatively high levels. Since proteases  
422 play an important role in parasite host-pathogen interaction, it was not surprising  
423 to see highly expressed Cathepsin L and protease inhibitors as part of the  
424 transcriptome. These observations are similar to that of *S. mansoni*, *F. gigantica*,  
425 *C. sinensis* and *O. viverrini* [27, 29, 58]. In these trematodes stress response  
426 genes, genes associated with ribosomes and translation, actin myosin complex  
427 and proteolytic enzymes appear to be highly expressed. The results suggest that  
428 the adult parasite is active in protein synthesis and is utilizing nutrients from the  
429 host to function at a high metabolic load for reproduction and egg development.

## 430 **Kinome**

431 Eukaryotic or conventional protein kinases (ePKs) play important  
432 regulatory roles in diverse cellular processes, such as metabolism, transcription,  
433 cell cycle progression, apoptosis, and neuronal development [59]. These are  
434 classified into eight groups, based on sequence similarity of their catalytic  
435 domains, the presence of accessory domains, and their modes of regulation [60,  
436 61, 62]. In addition to eight ePKs, a ninth group categorized as 'Other' and  
437 consisting of a mixed collection of kinases that cannot be classified easily into  
438 any of the groups is defined in the EMBL kinase database [41]. There are  
439 extensive studies on kinome of the model organism *C. elegans*. Kinases from  
440 this free-living nematode are deeply conserved in evolution, and the worm shares

441 family homologs as high as 80% with the human kinome. Out of a total of 438  
442 worm kinases nearly half are members of worm-specific or worm-expanded  
443 families. Studies point to recent evolution of such homologous genes in *C.*  
444 *briggsae* involved in spermatogenesis, chemosensation, Wnt signaling and FGF  
445 receptor-like kinases [63]. Our analysis of the *F. buski* transcriptome suggested  
446 190 ePKs (250 unigenes) belonging to all the nine groups of protein kinases. The  
447 results are shown in Fig 6 and S7 Table. The presence of multiple protein kinase  
448 families, actively expressed in the adult stage suggests that *F. buski* encodes an  
449 extensive signaling network and majority of these eukaryotic signal transduction  
450 pathways are conserved. In *F. gigantica*, 308 sequences of protein kinases  
451 belonging to eight ePK classes were found in the transcriptome dataset [29], in  
452 contrast the free-living nematode *C. elegans* encoded nearly 400 pathways [64].  
453 We ascribe this to the parasite biology or possible stage specific expression that  
454 could not be determined from the transcriptome dataset of single stages.

455 **Fig 6. A pie chart displaying a number of significant matches found against**  
456 **nine different protein kinase classes (according to EMBL kinase database)**  
457 **in *F. buski* transcriptome.** The protein kinase groups are represented by: (i)  
458 CMGC- cyclin-dependent, mitogen activated, glycogen synthase and CDK-like  
459 serine/threonine kinases; (ii) CAMK - Calcium/Calmodulin-dependent  
460 serine/threonine kinases; (iii) TK – Tyrosine kinases; (iv) TKL - Tyrosine kinase-  
461 like; (v) AGC - cAMP-dependent, cGMP-dependent and protein kinase C  
462 serine/threonine kinases; (vi) STE – serine/threonine protein kinases associated  
463 with MAP kinase cascade; (vii) CK1 - Casein kinases and close relatives; (viii)

464 RGC - Receptor guanylate cyclase kinases: represented by a single protein,  
465 receptor guanylate cyclase kinase and (ix) other unclassified kinases.

466

## 467 **Protease and protease inhibitors**

468 *F. buski* transcriptome suggests that a total of 478 proteases (MEROPS  
469 terms), corresponding to 6 catalytic types, and 138 protease inhibitors (138  
470 MEROPS terms) as defined in the MEROPS database are expressed in this  
471 organism [50]. The results are shown in Figure 7. Some of the highly expressed  
472 proteases are prolyl oligopeptidase family **of** serine proteases (206 MEROPS  
473 terms; 16 families), lysostaphin subfamily **of** metalloproteases (126 MEROPS  
474 terms; 21 families) and ubiquitin-specific peptidases **of the** cysteine proteases  
475 family (81 MEROPS terms; 22 families) in addition to a significant number of  
476 protease inhibitors (138 MEROPS terms; 14 families) (Fig 7 and S8 Table)

477 **Figure 7: Protease and protease inhibitors (MEROPS terms) found in *F.***  
478 ***buski* transcriptome.**

479

## 480 **RNAi pathway genes**

481 RNA interference (RNAi), a gene silencing process generally triggered by  
482 double-stranded RNA (dsRNA) delivers gene-specific dsRNA to a competent  
483 cell, thereby engaging the RNAi pathway leading to the suppression of target  
484 gene expression. RNAi pathway has played a crucial role in our current  
485 understanding of genotype to phenotype relations in many organisms, including  
486 *C. elegans*. Presence of this pathway in *F. buski* may be useful in deciphering



487 functions of genes as these are not amenable to classical genetic approaches.  
488 We tried to decipher from the transcriptome data if this pathway exists in *F. buski*  
489 and the divergence from RNAi pathway of other related parasites. The results  
490 are summarized in Table 3. Orthologs were found for all the genes associated  
491 with small RNA biosynthesis of *C. elegans* in *F. buski* except *rde-4*. This gene is  
492 also absent in the genome of most of the parasitic nematodes except *Brugia*  
493 *malayi* and *Ancylostoma caninum* [65]. The major differences from pathways  
494 present in *Schistosoma mansoni* and *C. elegans*, are lack of genes related to  
495 dsRNA uptake and spreading (*sid-1*, *sid-2*, *rsd-6*). Absence of these genes is  
496 reported in most of the nematodes outside the genus *Caenorhabditis* [65]. In  
497 contrast, phylogenetic neighbors of *Schistosoma* sp. possess ortholog of *sid-1*  
498 which is responsible for dsRNA entry in soaked parasites, though this protein is  
499 much larger than *sid-1* in *C. elegans*. Another conserved protein *rsd-3* is found in  
500 almost all the nematodes studied, though its functional collaborators are missing  
501 in most of the organisms. [65]. Other than small RNA biosynthesis, proteins  
502 associated with nuclear effectors were mostly identified except the absence of  
503 less conserved *mes-3*, *rde-2*, *ekl-5* etc [65]. Overall, orthologs for most  
504 conserved proteins from each functional category [65] were found, whereas, the  
505 less conserved ones remained unknown.

506 **Table 3. Proteins of RNAi pathway identified from *F. buski* transcriptome.**

|                        | <i>Caenorhabditis elegans</i>                                                                      | <i>Fasciolopsis buski</i>                                                           |
|------------------------|----------------------------------------------------------------------------------------------------|-------------------------------------------------------------------------------------|
| Small RNA biosynthesis | <i>dcr-1</i> , <i>drh-1/3</i> , <i>drsh-1</i> ,<br><i>pash-1</i> , <i>rde-4</i> , <i>xpo-1/2/3</i> | <i>dcr-1</i> , <i>drh-1/3</i> , <i>drsh-1</i> ,<br><i>pash-1</i> , <i>xpo-1/2/3</i> |
| dsRNA uptake and       | <i>sid-1/2</i> , <i>rsd-3/6</i>                                                                    | <i>rsd-3</i>                                                                        |

|                        |                                                                       |                                              |
|------------------------|-----------------------------------------------------------------------|----------------------------------------------|
| spreading              |                                                                       |                                              |
| siRNA amplification    | rsd-2, ego-1, rrf-1/3, smg-2/5/6                                      | smg-2/6                                      |
| Argonautes             | alg-1/2/3/4, csr-1, ergo-1, nrde-3, ppw-1/2, prg-1/2, rde-1, sago-1/2 | alg-1/2                                      |
| RISC proteins          | ain-1/2, tsn-1, vig-1                                                 | tsn-1                                        |
| RNAi inhibitors        | adr-1/2, eri-1/3/5/6/7, lin-15b, xrn-1/2                              | eri-1/7, xrn-1/2                             |
| Nuclear RNAi effectors | cid-1, ekl-1/4/5/6, gfl-1, mes-2/3/6, mut-2/7/16, rde-2, rha-1, zfp-1 | cid-1, ekl-4/6, gfl-1, mes-2/6, rha-1, zfp-1 |

507

508

## 509 **Transposable elements (TEs)**

510 Repetitive elements are important structural features of a genome and  
511 transcriptome as many of these are transcribed. Retrotransposable elements  
512 (RTEs) constitute the main type of interspersed repeats particularly in higher  
513 eukaryotic genomes [66]. Therefore, we analyzed the *F. buski* transcriptome for  
514 identification of expressed repetitive elements, particularly interspersed  
515 elements. A total of 3720 retroelements that include 3477 LINES in the *F. buski*  
516 transcriptome are outlined in Table 4. All LINE elements are not expressed;  
517 genomic LINE elements were also detected (S9 Table). In contrast to LINES, the  
518 data was under-represented for SINE elements. T2#SINE/tRNA were identified  
519 from the transcriptome sequences. These results are similar to reports from other  
520 trematodes, such as *C. sinensis* [27, 29, 67] where SINE elements were also not  
521 reported. Additionally, several LTR retrotransposable elements and DNA

522 transposons (Table 4), whose roles in parasite biology and genome organization  
523 are not yet well defined were identified.

524 **Table 4. Number of different repeat elements identified from genome and**  
525 **transcriptome of *F. buski*.**

526

|                 | Number of elements in<br>Genome | Number of elements<br>in Transcriptome |
|-----------------|---------------------------------|----------------------------------------|
| Retroelements   | 3556                            | 3720                                   |
| SINE            | 0                               | 2                                      |
| Penelope        | 50                              | 129                                    |
| LINEs:          | 3155                            | 3477                                   |
| L2/CR1/Rex      | 94                              | 96                                     |
| R2/R4/NeSL      | 6                               | 11                                     |
| RTE/Bov-B       | 2808                            | 2975                                   |
| LTR elements    | 401                             | 241                                    |
| BEL/Pao         | 14                              | 6                                      |
| Gypsy/DIRS1     | 387                             | 235                                    |
| DNA transposons | 0                               | 0                                      |
| Simple repeats  | 51778                           | 19541                                  |
| Low complexity  | 425                             | 1443                                   |

527

528

## 529 Discussion

530 Human parasites are a diverse group of organisms, ranging from  
531 unicellular protists to multicellular trematodes. Most well studied molecular data  
532 on human host-parasite interactions are from parasites, such as *Plasmodium* and  
533 *Leishmania*. Lack of information and complex ecological relationship of

534 multicellular flukes limits our understanding of trematode biology. Recently,  
535 availability of new and cheap genome sequencing technologies (NGS) has  
536 opened up research avenues for characterization of these organisms. This is  
537 reflected in a number of studies that have been published recently on these  
538 parasites based on genomic information.

539 North-east India is considered to be a hot bed of diversity and it is  
540 believed that many organisms from this region have evolved interesting biology  
541 due to their evolution in a unique ecological niche. In this report we present data  
542 about characterization of a trematode parasite *F. buski* (the giant intestinal fluke  
543 having a zoonotic potential) using genome sequencing and RNA-seq analysis.  
544 Transcriptome sequencing helped us identify 30677 genes from the parasite, and  
545 we annotated 12380 genes, driven by longer assembly, that enabled more  
546 authentic functional annotation of the unigenes.

547 Majority of the highly expressed genes in *F. buski* have also been reported  
548 in other organisms including trematodes. We note a high level expression of  
549 transcripts encoding cytoskeletal elements, protein biosynthesis and folding in  
550 the adult stage of the parasite. Parasites infect host and are reliant on the host  
551 for their nutrient supply during their growth and development cycle [56]. The  
552 parasite is studied at an adult infective stage, where development has switched  
553 to the reproductive stage with a high metabolic load required for regular egg  
554 production. Reproductive development and egg production require high levels of  
555 transcript accumulation and associated protein synthesis, often in conjunction  
556 with reorganization of cytoskeletal elements. High-energy costs of eggshell

557 production in *F. buski* require efficient energy generation and high expression of  
558 these enzymes may explain this. Cytoskeleton proteins are involved in  
559 intracellular transport and glucose uptake in larvae and adult parasites and serve  
560 as outlets for their glycogen stores [68]. We noted the high expression of genes  
561 encoding fatty acid binding proteins (FABP) that support the role of these  
562 molecules in acquisition, storage, and transport of lipids. Since many of these  
563 display unique properties, FABPs have been suggested as potential vaccine  
564 candidates [69]. We also speculate the difference in the fatty acid metabolic  
565 processes, with higher enrichment of gene targets for catabolism, compared to  
566 biosynthesis, which can be critical to the parasite biology at the adult stage.  
567 Empirical comparison with other data sets from trematodes suggest, absence of  
568 biosynthesis in the adult stage, either by a gene-regulatory mechanism or lack of  
569 components in the fatty acid biosynthesis. This would warrant further  
570 investigation in the light that these parasites have been known to acquire fatty  
571 acids from the host [56].

572 Different proteases are expressed in trematodes such as *F. hepatica*, *C.*  
573 *sinensis* and *S. mansoni*. Proteases play a significant role in parasite physiology  
574 as well as in host–parasite interactions [70-72]. In general genes encoding six  
575 different ‘catalytic type’ of proteases, were identified in the *F. buski*  
576 transcriptome, and were expressed at relatively high-levels. Amongst them, the  
577 serine and cysteine proteases and serine protease inhibitors were highly  
578 represented in unigenes expressed in the adult stage. In the blood fluke, *S.*  
579 *mansoni*, serine proteases were implicated in tissue invasion and host immune

580 evasion [73, 74]. Cysteine proteases have roles in nutrition, tissue/cell invasion,  
581 excystment/encystment, exsheathment and hatching, protein processing and  
582 immune-evasion [75]. Papain-like cysteine proteases, particularly the cathepsins,  
583 facilitate skin and intestine infections, tissue migration, feeding and suppression  
584 of host immune effector cell functions [76]. Serine protease inhibitors (serpins)  
585 are a super family of structurally conserved proteins that inhibit serine proteases  
586 and are involved in many important endogenous regulatory processes and  
587 possible regulation of host immune modulation and/or evasion processes [77].

588 We report the expression of globin genes (Hemoglobin F2 and Myoglobin  
589 I), which was also found to be abundant in *F. buski* transcriptome. The functional  
590 role of trematode haemoglobin (Hbs) is still not clear, as adult parasitic  
591 trematodes and also nematodes, such as *Ascaris suum*, are residents of semi-  
592 anaerobic environment. It is believed that the function of hemoglobin is not only  
593 restricted to O<sub>2</sub> transport but also as an oxygen scavenger, a heme reserve for  
594 egg production, and as co-factor of NO deoxygenase [78-82].

595 The kinome of *F. buski* is similar to other eukaryotes, although the gene  
596 family redundancy within protein kinases identified was fewer than reported from  
597 free-living nematode. The functional repertoire suggest the presence of an  
598 extensive signaling system, that may be required for sensing and modulating  
599 signal response in the changing life-cycle and adult development/reproduction in  
600 the intra-host environment. CMGC kinases were relatively the most abundant in  
601 terms of number of sequences, followed by CAM kinases. This data correlates  
602 well with the observation of liver parasite *F. gigantica* [29] and blood fluke,

603 *Schistosoma mansoni* [83]. CMGC kinases are known to regulate cell  
604 proliferation and ensure correct replication and segregation of organelles in many  
605 eukaryotic organisms including *Plasmodium falciparum* [84]. CAM kinases are  
606 associated with calcium-mediated signaling. Among CAMKs in *F. buski*, the  
607 majority of kinases belonged to the CAMK-like kinases (CAMK family 1 and 2),  
608 death-associated protein kinases (DAPKs) and the myosin light chain kinases  
609 (MLCKs). The primary function of MLCK is to stimulate muscle contraction  
610 through phosphorylation of myosin II regulatory light chain (RLC), a eukaryotic  
611 motor protein that interacts with filamentous actin [83]. The high abundance of  
612 the above-mentioned kinase groups may reflect high mobility and muscle activity  
613 in *F. buski* associated with feeding and egg shedding.

614       Expression of genes involved in RNAi pathway suggests partial evidence  
615 of an active pathway. We noted absence of the protein required for RNA uptake,  
616 and speculate that RNAi would be active if introduced into the cytoplasm  
617 considering siRNA as a possible therapy.

618       *F. buski* genome also encodes different types of transposons as  
619 interspersed repetitive sequences similar to other eukaryotes. Members of the  
620 Phylum Platyhelminthes are also thought to contain diverse TEs, which comprise  
621 up to 40% of their genomes. A total of 29 retrotransposons, belonging to one  
622 non-long terminal-repeat (LTR) family (6 elements in CR1) and 3 LTR families (5  
623 elements in Xena and Bel, and 13 elements in Gypsy) have been isolated from  
624 the genomes of the digenean trematodes, *C. sinensis* and *Paragonimus*  
625 *westermani*. CsRn1 of *C. sinensis* and PwRn1 of *P. westermani* are novel

626 retrotransposons, which are evenly distributed throughout their genomes and  
627 expressed as full transcripts in high copy numbers. Phylogenetic studies have  
628 revealed that the CsRn1 and PwRn1 elements formed a novel, tightly-conserved  
629 clade, that has evolved uniquely in the metazoan genomes. Diverse  
630 retrotransposon families are present in the lower animal taxa, and that some of  
631 these elements comprise important intermediate forms marking the course of  
632 evolution of the LTR retrotransposons. Retrotransposons in trematodes might  
633 influence the remodeling of their host genomes [60].

634         Two novel families of tRNA-related SINEs have been described to be  
635 widespread among all *Salmonoidei* genomes, with a role in human helminth  
636 pathogen—*Schistosoma japonicum* (Trematoda: Strigeiformes) [85]. We could  
637 identify only two SINE elements from the *F. buski* transcriptome data. Lack of  
638 widespread presence of SINE elements in flukes raises interesting questions  
639 about evolution of SINEs [85]. SINEs have been reported in early branching  
640 protists, such as *Entamoeba histolytica* [86] The inability to detect SINE elements  
641 in other trematodes and presence of two families in *F. buski* suggest that these  
642 may have come by horizontal transfer possibly with some evolutionary  
643 advantage. It is possible that SINEs may have been lost from the genome during  
644 evolution in these organisms. We also found that not all LINE elements are  
645 expressed in the adult stage. Overall the transcriptome of *F. buski* has shed new  
646 light on the biology of this organism.

647         In conclusion, the rough draft genome and transcriptome characterized in  
648 the present study will assist in future efforts to decode the entire genome of *F.*



649 *buski*. The transcriptome data of the adult stage of this giant intestinal fluke is  
650 reported for the first time, and is archived in the NCBI SRA as well as in the  
651 database (North-East India Helminth Parasite Information Database) developed  
652 by our group (NEIHPID) [87]. We hope our study adds substantially to the public  
653 information platform to achieve a fundamental understanding of the parasite  
654 biology, which in turn would help in identification of potential drug targets and  
655 host-pathogen interaction studies.

656

## 657 **Author Contributions**

658 DKB and VT conceived and designed the experiments, analyzed the data,  
659 contributed reagents/materials/analysis tools, wrote the paper. DKB, TR and PP  
660 performed the experiments. DKB, TR and PP performed the bioinformatics  
661 analysis. All authors reviewed the manuscript.

662

## 663 **Additional Information**

664 The authors declare no competing financial interests.

## 665 **DNA Deposition**

666 DNA sequences were deposited as follows:

667 National Centre for Biotechnology Information (NCBI) Bioproject Accession:

668 PRJNA212796 ID: 212796

669 NCBI Sequence Read Archive (SRA): **SRP028107**, SRX327895, SRX326786,

670 SRX316736

671

672 **Acknowledgement**

673 We would like to acknowledge Dr. Sriram Parameswaran, Genotypic Technology  
674 (P) Ltd., Bangalore, Karnataka for his useful suggestions while carrying out the  
675 NGS analysis, Dr. Sudip Ghatani, Department of Zoology, NEHU, Shillong for  
676 collecting the biosamples and M/s Genotypic Technologies, Bangalore, India for  
677 carrying out NGS sequencing for this project.

678

## 679 **References**

- 680 1. CDC (2009) "DPDx - Fasciolopsiasis". Laboratory Identification of Parasites  
681 of Public Health Concern. Available from:  
682 <http://www.dpd.cdc.gov/dpdx/HTML/Fasciolopsiasis.htm>.
- 683 2. Le T, Nguyen V, Phan B, Blair D, McManus D Case report: unusual  
684 presentation of *Fasciolopsis buski* in a Vietnamese child. Trans R Soc Trop  
685 Med Hyg. 2004; 98: 193-194.
- 686 3. Roy B, Tandon V. Morphological and microtopographical strain variations  
687 among *Fasciolopsis buski* originating from different geographical areas. Acta  
688 Parasitol. 1993; 38: 72-77.
- 689 4. Roy B, Tandon V *Fasciolopsis buski*. In: Miliotis MD, Bier JW, editors.  
690 International handbook of foodborne pathogens. New York, Basel: Marcel  
691 Decker, Inc; 2003. pp. 563-570.
- 692 5. Mas-Coma S, Bargues M, Valero M (2005) Fascioliasis and other plant-borne  
693 trematode zoonoses. Int J Parasitol 35: 1255-1278.
- 694 6. Chai JY, Shin EH, Lee SH, Rim HJ Foodborne Intestinal Flukes in Southeast  
695 Asia. Korean J Parasitol. 2009; 47(Suppl), S69.
- 696 7. Raymondo, D "Parasitology Training Manual - *Fasciolopsis buski*". Available  
697 from: <http://www.practicalscience.com/fb.html>.
- 698 8. Nakagawa K. The development of *Fasciolopsis buski* Lankester. J Parasitol.  
699 1992; 8: 161-166.
- 700 9. Bunnag D, Radomyos P, Harinasuta T. Field trial on the treatment of  
701 fasciolopsiasis with praziquantel. Southeast Asian J Trop Med Public Health.

- 702 1983; 14: 216-219.
- 703 10. Harinasuta T, Bunnag D, Radomyos P. Efficacy of praziquantel on  
704 fasciolopsiasis. *Arzneimittelforschung* 1984; 34: 1214-1215.
- 705 11. Handoyo I, Ismuljowono B, Darwis F, Rudiensyah. A survey of fasciolopsiasis  
706 in Sei Papuyu village of Babirik subdistrict, Hulu Sungei Utara Regency,  
707 South Kalimantan Province. *Trop Biomed.* 1986; 3: 113-118.
- 708 12. Lee HH. Studies on epidemiology and treatment of fasciolopsiasis in southern  
709 Taiwan. *Kaohsiung J Med Sci.* 1986; 2: 21-27.
- 710 13. Taraschewski H, Mehlhorn H, Bunnag D, Andrews P, Thomas H. Effects of  
711 praziquantel on human intestinal flukes (*Fasciolopsis buski* and *Heterophyes*  
712 *heterophyes*). *Zentralbl Bakteriol Mikrobiol Hyg.* 1986; 262: 542-550.
- 713 14. Gupta, A. et al. *Fasciolopsis buski* (giant intestinal fluke) - a case report.  
714 *Indian J Pathol Microbiol.* 1999; 42:59-60.
- 715 15. Datta S, Mukerjee GS, Ghosh JD. Comparative efficacy of triclabendazole,  
716 oxyclozanide and rafoxanide against *Fasciolopsis buski* in naturally infected  
717 pigs. *Indian J Anim Health.* 2004; 43: 53-56.
- 718 16. World Health Organization. Foodborne trematode infections. *Bull WHO* 1995;  
719 73: 397-399.
- 720 17. World Health Organization Control of foodborne trematode infections. WHO  
721 Tech Rep Ser. 1995; 849: 1-157.
- 722 18. Bhatti HS, Malla N, Mahajan RC, Sehgal R. Fasciolopsiasis - a re-emerging  
723 infection in Azamgarh (Uttar Pradesh). *Indian J Pathol Microbiol.* 2000; 43:  
724 73-76.

- 725 19. Muralidhar S, Srivastava L, Aggarwal P, Jain N, Sharma DK. Fasciolopsiasis -  
726 a persisting problem in eastern U.P. - a case report. Indian J Pathol Microbiol.  
727 2000; 43: 69-71.
- 728 20. Prasad PK, Tandon V, Chatterjee A, Bandyopadhyay S. PCR-based  
729 determination of internal transcribed spacer (ITS) regions of ribosomal DNA  
730 of giant intestinal fluke, *Fasciolopsis buski* (Lankester, 1857) Looss, 1899.  
731 Parasitol Res. 2007; 101: 1581-1587.
- 732 21. Tandon V, Roy B, Prasad PK. Chapter 32. Fasciolopsis. In: Liu D, editor.  
733 Molecular Detection of Human Parasitic Pathogens. Boca Raton, Florida:  
734 CRC Press. 2012. pp. 353-364.
- 735 22. Bentley, D.R. et al. Accurate whole human genome sequencing using  
736 reversible terminator chemistry. Nature. 2008; 456: 53-59.
- 737 23. Harris, T.D. et al. Single-molecule DNA sequencing of a viral genome. 2008;  
738 Science 320: 106-109.
- 739 24. Margulies, M. et al. Genome sequencing in microfabricated high-density  
740 picolitre reactors. Nature. 2005; 437: 376-380.
- 741 25. Pandey V, Nutter RC, Prediger E. Applied Biosystems SOLiD™ System:  
742 Ligation-based sequencing. In: Michal Janitz, editor. Next-generation genome  
743 sequencing: Towards personalized medicine. Wiley. 2008. pp. 29-41.
- 744 26. Wheat CW, Vogel H. Transcriptome sequencing goals, assembly, and  
745 assessment. Methods Mol Biol. 2011; 772: 129-144.
- 746 27. Young, N.D. et al. Unlocking the transcriptomes of two carcinogenic  
747 parasites, *Clonorchis sinensis* and *Opisthorchis viverrini*. PLoS Negl Trop Dis.

- 748 2010; 4:e719.
- 749 28. Young ND, Hall RS, Jex AJ, Cantacessi C, Gasser RB. Elucidating the  
750 transcriptome of *Fasciola hepatica* - a key to fundamental and  
751 biotechnological discoveries for a neglected parasite. *Biotechnol Adv.* 2010;  
752 28: 222-231.
- 753 29. Young, N.D. et al. A portrait of the transcriptome of the neglected trematode,  
754 *Fasciola gigantica* - biological and biotechnological implications. *PLoS Negl*  
755 *Trop Dis.* 2011; 5:e1004.
- 756 30. Almeida, G.T. et al. Exploring the *Schistosoma mansoni* adult male  
757 transcriptome using RNA-seq. 2012; *Exp Parasitol* 132: 22-31.
- 758 31. Cantacessi, C. et al. A deep exploration of the transcriptome and  
759 “excretory/secretory” proteome of adult *Fascioloides magna*. *Mol Cell*  
760 *Proteomics.* 2012; 11: 1340-1353.
- 761 32. Garg, G. et al. The transcriptome of *Echinostoma caproni* adults: Further  
762 characterization of the secretome and identification of new potential drug  
763 targets. *J Proteomics.* 2013; Available from:  
764 <http://dx.doi.org/10.1016/j.jprot.2013.06.017>
- 765 33. Biswal DK, Ghatani S, Shylla JA, Sahu R, Mullapudi N, Bhattacharya A,  
766 Tandon V. An integrated pipeline for next generation sequencing and  
767 annotation of the complete mitochondrial genome of the giant intestinal fluke,  
768 *Fasciolopsis buski* (Lankester, 1857) Looss, 1899. *PeerJ.* 2013; 1:e207
- 769 34. Sambrook J, Fritsch EF, Maniatis T (1989) *Molecular cloning: a laboratory*  
770 *manual*, 2nd edn. Cold Spring Harbor: Cold Spring Harbor Laboratory Press.

- 771 35. Grabherr MG, Haas BJ, Yassour M, Levin JZ, Thompson DA, et al. (2011)  
772 Full-length transcriptome assembly from RNA-seq data without a reference  
773 genome. *Nat Biotechnol* 29: 644-652.
- 774 36. Li W, Godzik A (2006) Cd-hit: a fast program for clustering and comparing  
775 large sets of protein or nucleotide sequences. *Bioinformatics* 22: 1658-1659.
- 776 37. Langmead B, Trapnell C, Pop M, Salzberg SL (2009) Ultrafast and memory-  
777 efficient alignment of short DNA sequences to the human genome. *Genome*  
778 *Biol* 10: R25.
- 779 38. UniProt Consortium. UniProt: a hub for protein information. *Nucleic Acids*  
780 *Res.* 2015; 43(Database issue): D204-12.
- 781 39. Elsworth B, Wasmuth J, Blaxter M NEMBASE4: the nematode transcriptome  
782 resource. *Int J Parasitol.* 2011; 41: 881-894.
- 783 40. McGinnis S, Madden TL. BLAST: at the core of a powerful and diverse set of  
784 sequence analysis tools. *Nucleic Acids Res.* 2004; 1:32 (Web Server issue):  
785 W20-5.
- 786 41. Hunter, S. et al. InterPro: the integrative protein signature database. *Nucleic*  
787 *Acids Res.* 2009; 37: D211-215.
- 788 42. Tatusov, R.L. et al. The COG database: an updated version includes  
789 eukaryotes. *BMC Bioinformatics.* 2003; 4: 41.
- 790 43. Conesa, A. et al. Blast2GO: a universal tool for annotation, visualization and  
791 analysis in functional genomics research. *Bioinformatics.* 2005; 21: 3674-  
792 3676.
- 793 44. Ye, J. et al. WEGO: a web tool for plotting GO annotations. *Nucleic Acids*

- 794 Res. 2006; 34: W293-297.
- 795 45. Moriya Y, Itoh M, Okuda S, Yoshizawa A, Kanehisa M KAAS: an automatic  
796 genome annotation and pathway reconstruction server. *Nucleic Acids Res.*  
797 2007; 35: W182-185.
- 798 46. Letunic I, Yamada T, Kanehisa M, Bork P ipath: interactive exploration of  
799 biochemical pathways and networks. *Trends Biochem Sci.* 2008; 33: 101-103.
- 800 47. Min XJ, Butler G, Storms R, Tsang A. OrfPredictor: predicting protein-coding  
801 regions in EST-derived sequences. *Nucleic Acids Res.* 2005; 33: W677-680
- 802 48. Bendtsen JD, Nielsen H, von Heijne G, Brunak S. Improved prediction of  
803 signal peptides: SignalP 3.0. *J Mol Biol.* 2004; 340: 783-795.
- 804 49. Krogh A, Larsson B, von Heijne G, Sonnhammer EI. Predicting  
805 transmembrane protein topology with a hidden Markov model: application to  
806 complete genomes. *J Mol Biol.* 2001; 305: 567-580.
- 807 50. Rawlings ND, Barrett AJ, Bateman A. MEROPS: the database of proteolytic  
808 enzymes, their substrates and inhibitors. *Nucl Acids Res.* 2012; 40: D343-  
809 D350.
- 810 51. Zerbino DR, Birney E. Velvet: Algorithms for de novo short read assembly  
811 using de Bruijn graphs. *Genome Res.* 2008; 18: 821-829.
- 812 52. Simpson, J.T. et al. ABySS: A parallel assembler for short read sequence  
813 data. *Genome Res.* 2009; 19: 1117-1123.
- 814 53. Li, R. et al. De novo assembly of human genomes with massively parallel  
815 short read sequencing. *Genome Res.* 2010; 20: 265-272.
- 816 54. Smit AFA, Hubley R & Green P. RepeatMasker Open-3.0. 1996-2010



- 817 <<http://www.repeatmasker.org>>
- 818 55. Waeschenbach A, Webster BL, Littlewood DT. Adding resolution to ordinal  
819 level relationships of tapeworms (Platyhelminthes: Cestoda) with large  
820 fragments of mtDNA. *Mol Phylogenet Evol.* 2012; 63:834-847
- 821 56. Barrett J. *Biochemistry of Parasitic Helminths*, University Park Press.  
822 Baltimore. 1981; 308 p
- 823 57. Conesa A, Madrigal P, Tarazona S, Gomez-Cabrero D, Cervera A,  
824 McPherson A, Szczesniak MW, Gaffney DJ, Elo LL, Zhang X, Mortazavi A. A  
825 survey of best practices for RNA-seq data analysis. *Genome Biol.* 2016;  
826 17:13. doi: 10.1186/s13059-016-0881-8. Review. Erratum in: *Genome Biol.*  
827 2016; 17(1): 181.
- 828 58. Protasio, A.V. et al. A systematically improved high quality genome and  
829 transcriptome of the human blood fluke *Schistosoma mansoni*. *PLoS Negl*  
830 *Trop Dis.* 2012; 6: e1455.
- 831 59. Kannan N, Neuwald AF. Evolutionary constraints associated with functional  
832 specificity of the CMGC protein kinases MAPK, CDK, GSK, SRPK, DYRK,  
833 and CK2alpha. *Protein Sci.* 2004;13:2059-77
- 834 60. Hanks SK, Hunter T. Protein kinases 6. The eukaryotic protein kinase  
835 superfamily: kinase (catalytic) domain structure and classification. *FASEB J.*  
836 1995; 9: 576-596.
- 837 61. Manning G, Whyte DB, Martinez R, Hunter T, Sudarsanam S. The protein  
838 kinase complement of the human genome. *Science.* 2002; 298: 1912-1934.
- 839 62. Miranda-Saavedra D, Barton GJ. Classification and functional annotation of

- 840 eukaryotic protein kinases. *Proteins*. 2007; 68: 893-914.
- 841 63. Eisenmann DM. Wnt signaling WormBook, ed. The *C. elegans* Research  
842 Community, WormBook. 2005; doi/10.1895/wormbook.1.7.1. Available from:  
843 <http://www.wormbook.org>.
- 844 64. Plowman G, Sudarsanam S, Bingham J, Whyte D, Hunter T. The Protein  
845 kinases of *Caenorhabditis elegans*: A model for signal transduction in  
846 multicellular organisms. *Proc Natl Acad Sci USA*. 1999; 96: 13603-13610
- 847 65. Dalzell, J.J. et al. RNAi effector diversity in nematodes. *PLoS Negl Trop Dis*.  
848 2011; 5: e1176
- 849 66. Finnegan DJ. Retrotransposons. *Curr Biol*. 2012; 22(11):R432-7.
- 850 67. Brindley PJ, Laha T, McManus DP, Loukas A. Mobile genetic elements  
851 colonizing the genomes of metazoan parasites. *Trends Parasitol*. 2003; 19:  
852 79-87.
- 853 68. Robertson, A.P. et al. Antinematodal drugs - modes of action and resistance:  
854 and worms will not come to Thee. In: Caffrey ER, editor. *Parasitic Helminths,*  
855 *Targets, Screens, Drugs and Vaccines*. Weinheim, Germany: Wiley-  
856 Blackwell. 2012; pp. 233-249.
- 857 69. Nie, H.M. et al. Cloning and characterization of the fatty acid-binding protein  
858 gene from the protoscolex of *Taenia multiceps*. *Parasitol Res*. 2013; 112:  
859 1833-1839.
- 860 70. Chen, M. et al. The anti-helminthic niclosamide inhibits Wnt/ Frizzled1  
861 signaling. *Biochemistry*. 2009; 48: 10267-10274.
- 862 71. Horn, M. et al. Mapping the pro-peptide of the *Schistosoma mansoni*

- 863        cathepsin B1 drug target: modulation of inhibition by heparin and design of  
864        mimetic inhibitors. ACS Chem Biol. 2011; 6: 609-617.
- 865    72. Jilkova, A. et al. Structural basis for inhibition of cathepsin B drug target from  
866        the human blood fluke, *Schistosoma mansoni*. J Biol Chem. 2011; 286:  
867        35770-35781.
- 868    73. Newport, G.R. et al. Cloning of the proteinase that facilitates infection by  
869        schistosome parasites. J Biol Chem. 1998; 263: 13179-13184.
- 870    74. Fishelson Z. Novel mechanisms of immune evasion by *Schistosoma*  
871        *mansoni*. Mem Inst Oswaldo Cruz. 1995; 90: 289-292.
- 872    75. Sajid M, McKerrow JH. Cysteine proteases of parasitic organisms. Mol  
873        Biochem Parasitol. 2002; 120: 1-21.
- 874    76. Dalton, J.P. et al. Proteases in trematode biology. In: Maule AG, Marks NJ,  
875        editors. Parasitic flatworms: Molecular biology, Biochemistry, Immunology  
876        and Physiology. Oxford: CAB International. 2006. pp. 348-368.
- 877    77. Molehin AJ, Gobert GN, McManus DP. Serine protease inhibitors of parasitic  
878        helminths. Parasitology. 2012; 139: 681-695.
- 879    78. Goldberg DE. The enigmatic oxygen-avid hemoglobin of *Ascaris*. Bioessays.  
880        1995; 17: 177-182.
- 881    79. Rashid, A.K. et al. Trematode myoglobins, functional molecules with a distal  
882        tyrosine. J Biol Chem 1997; 272: 2992-2999.
- 883    80. Minning, D.M. et al. *Ascaris* haemoglobin is a nitric oxide-activated  
884        “deoxygenase.” Nature; 1999. 401: 497-502.
- 885    81. Rashid AK, Weber RE Functional differentiation in trematode hemoglobin

- 886 isoforms. Eur J Biochem 1999. 260: 717-725.
- 887 82.de Guzman, J.V. et al. Molecular characterization of two myoglobins of  
888 *Paragonimus westermani*. J Parasitol. 2007; 93: 97-103.
- 889 83.Andrade, L.F. et al. Eukaryotic protein kinases (ePKs) of the helminth parasite  
890 *Schistosoma mansoni*. BMC Genomics. 2011; 12: 215.
- 891 84.Ward P, Equinet L, Packer J, Doerig C. Protein kinases of the human malaria  
892 parasite *Plasmodium falciparum*: the kinome of a divergent eukaryote. BMC  
893 Genomics. 2004; 5: 79.
- 894 85.Melamed P, Chong KL, Johansen MV. Evidence for lateral gene transfer from  
895 salmonids to two schistosome species. Nat Genet. 2004; 36: 786-787.
- 896 86.Matveev V, Nishihara H, Okada N. Novel SINE families from salmon validate  
897 *Parahucho* (Salmonidae) as a distinct genus and give evidence that SINEs  
898 can incorporate LINE-related 3'-tails of other SINEs. Mol Biol Evol. 2007; 24:  
899 1656-66.
- 900 87.Biswal DK, Debnath M, Kharumnuid G, Thongnibah W, Tandon V. Northeast  
901 India Helminth Parasite Information Database (NEIHPID): Knowledge Base  
902 for Helminth Parasites. PLoS One. 2016; 11(6):e0157459
- 903

## 904 **Supporting information**

905 **S1 Fig. Histogram displaying length of the unigenes.** Black bars represent all  
906 unigenes while red ones represent annotated unigenes only. Clearly, mean of  
907 length of annotated unigenes is higher than overall mean length of all unigenes.

908 **S2 Fig. Major components of metabolic pathways present in *F. buski***  
909 **transcriptome.** Colored edges represent proteins homologous to any *F. buski*  
910 unigene.

911 **S1 Table. Assembly statistics for *F. buski* genome using three denovo**  
912 **assemblers and transcriptome using Trinity.**

913 **S2 Table. Assembly assessment of unigenes used for annotation**

914 **S3 Table. BLASTx hits against NR database**

915 **S4 Table. Top 30 conserved domain/families identified by InterProScan**  
916 **from *F. buski* transcriptome**

917 **S5 Table. COG categories assigned to unigenes**

918 **S6 Table. RPKM values of each of the unigenes**

919 **S7 Table. List of different kinases identified from *F. buski* transcriptome**

920 **S8 Table. List of different protease and protease inhibitors identified from**  
921 ***F. buski* transcriptome**

922 **S9 Table. List of three LINE elements**

923

924

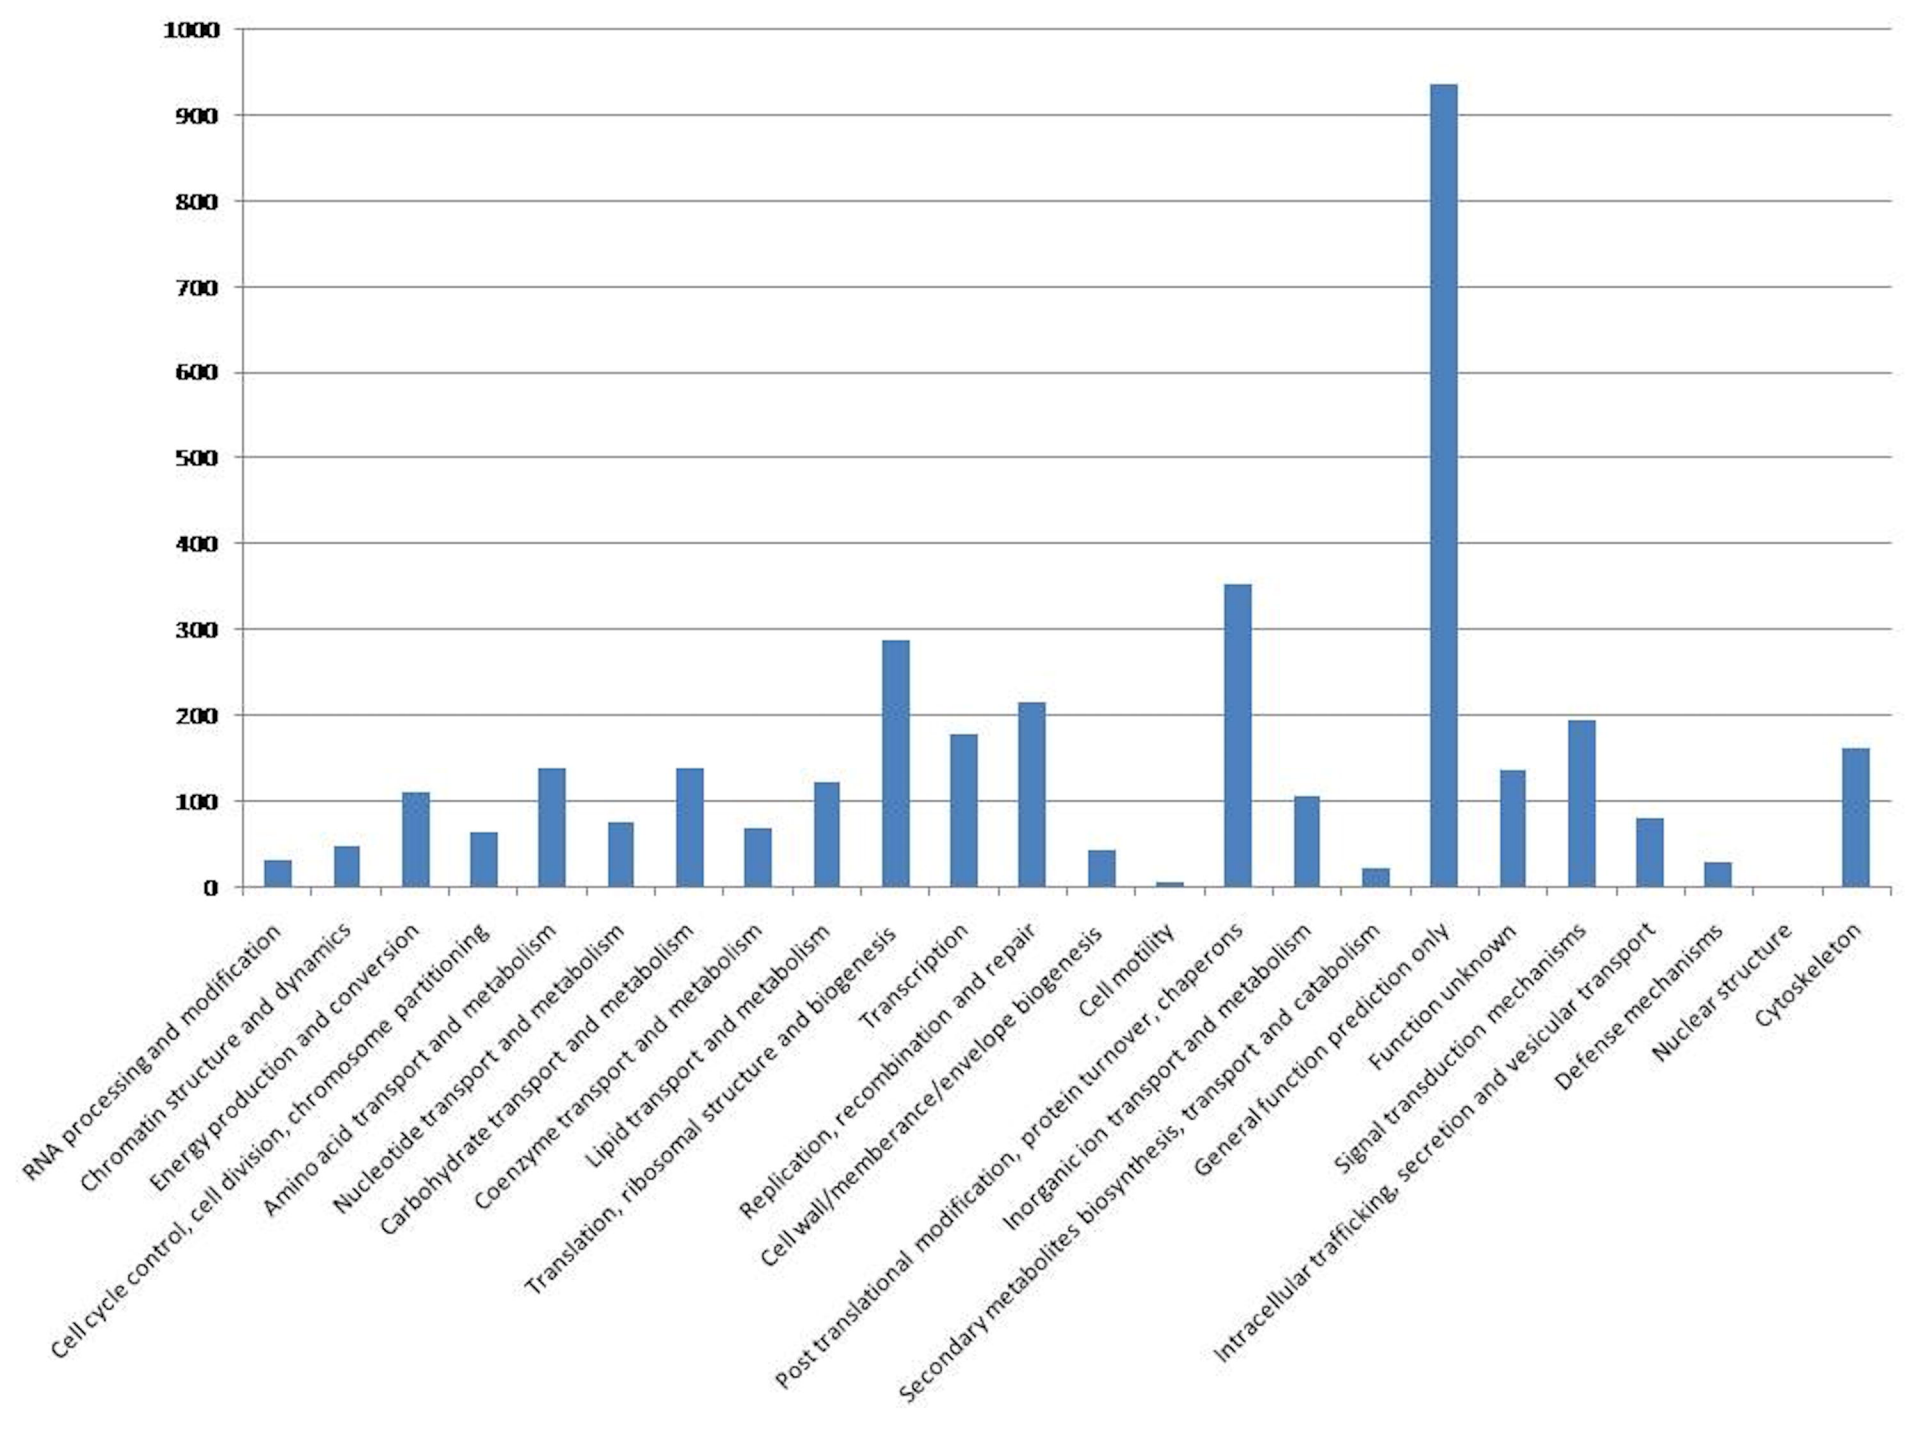





A

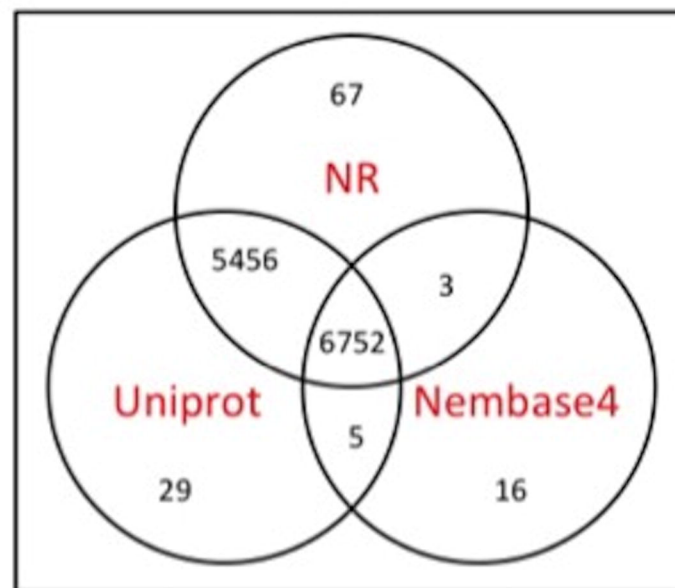

B

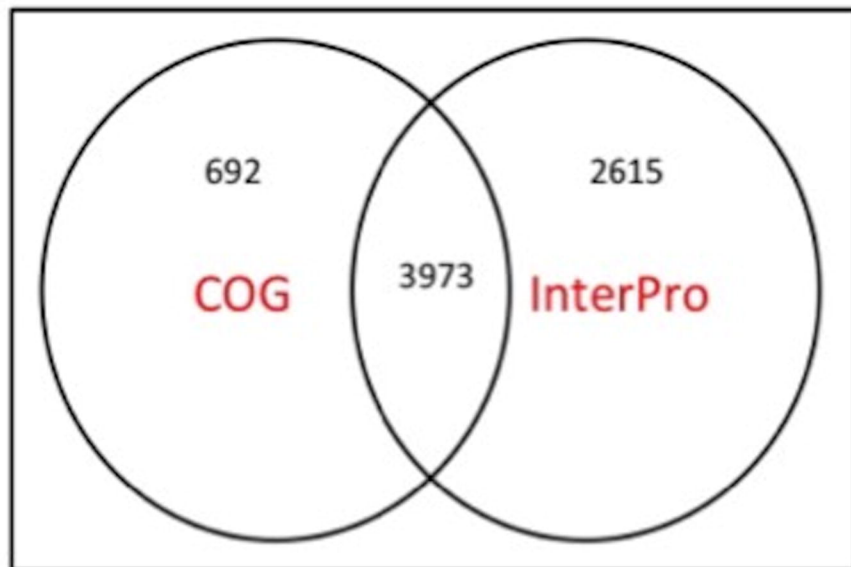

C

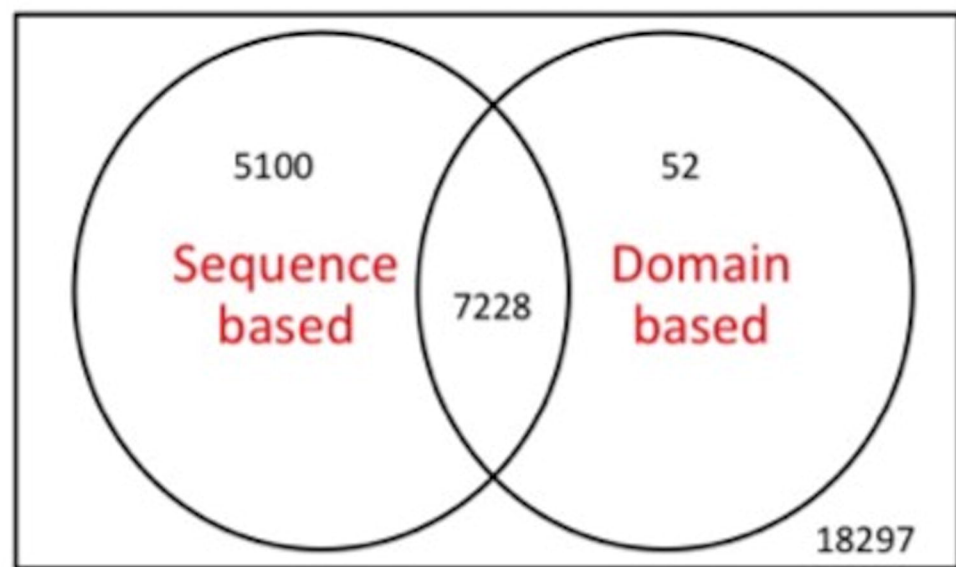



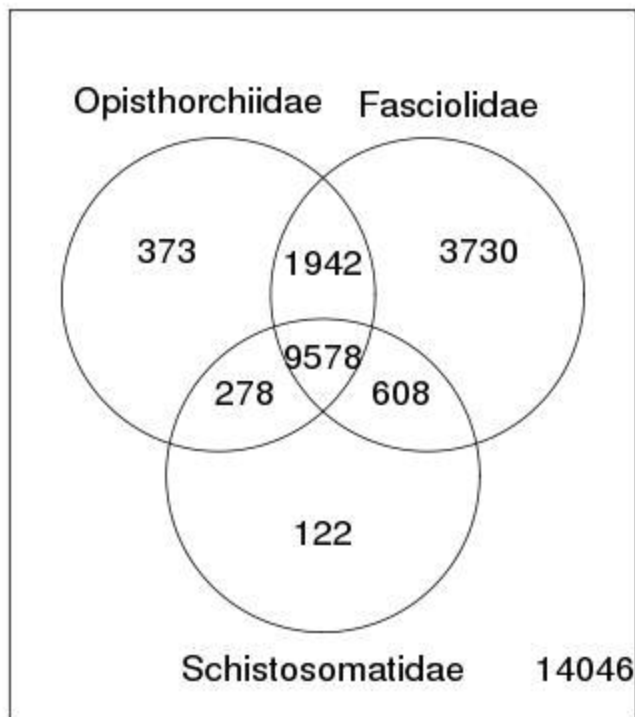

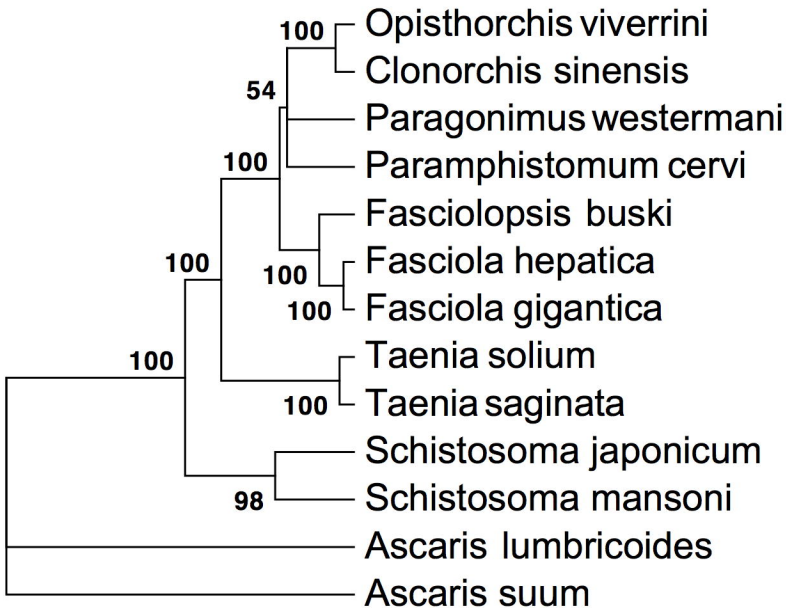

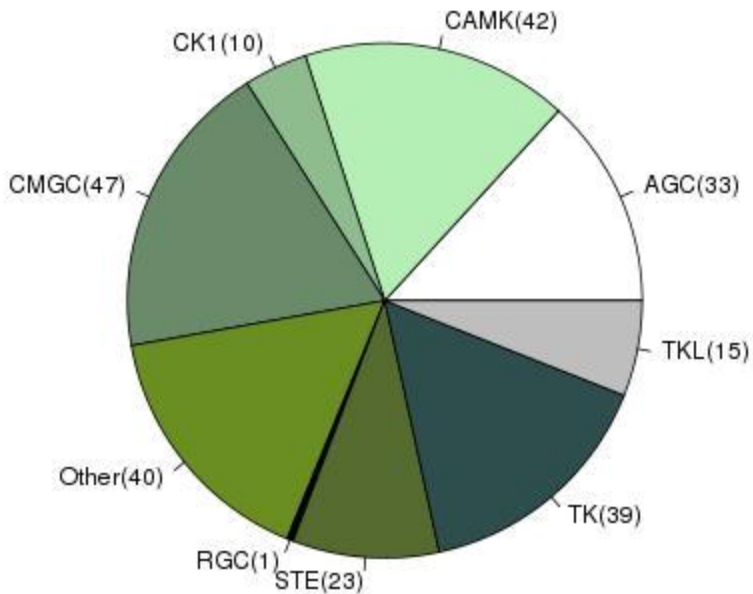

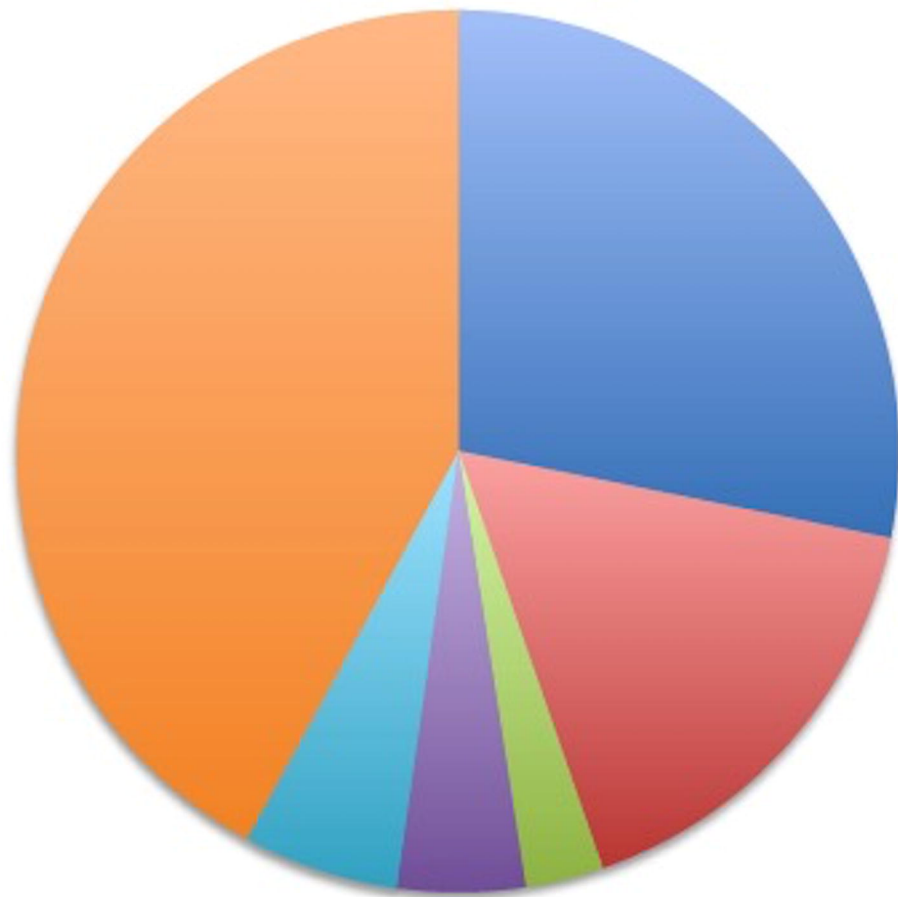

■ Protease inhibitor (138)

■ Cysteine (81)

■ Aspartic (14)

■ Unknown (23)

■ Threonine (28)

■ Serine (206)
